# Supplementary material for: Antimicrobial Photoinactivation Approach Based on Natural Agents for Control of Bacteria Biofilms in Spacecraft
Source: PubMed Central journal article supplement (PMC7554952; doi:10.3390/ijms21186932), 2020-09-21
Supplement: ijms-21-06932-s001.pdf [file ijms-21-06932-s001.pdf]

**Table 1.** Review of natural PSs-based API conditions used in different studies.

| Ref. | Photosensitizer (PS) | Bacteria species/strains (CFU×mL <sup>-1</sup> )                  |            | Modes of growth | Concentration of PS/dark toxicity | Preincubation time/medium         | Light source; wavelength; irradiance            | Light dose/illumination time   | API efficiency            |
|------|----------------------|-------------------------------------------------------------------|------------|-----------------|-----------------------------------|-----------------------------------|-------------------------------------------------|--------------------------------|---------------------------|
| 106  | Hypericin (Hyp)      | <i>Staphylococcus aureus</i> (10 <sup>6</sup> –10 <sup>7</sup> )  | ATCC 25923 | 1P              | 1 µg/mL/ <sup>3</sup> DS          | 5 min/ <sup>4</sup> PBS buffer    | <sup>5</sup> LED; 590 nm; 80 mW/cm <sup>2</sup> | 48 J/cm <sup>2</sup> /10 min   | 6.3 log <sub>10</sub>     |
|      |                      | <i>Escherichia coli</i> (10 <sup>6</sup> –10 <sup>7</sup> )       | ATCC 25922 |                 |                                   |                                   |                                                 |                                | 6.2 log <sub>10</sub>     |
|      |                      | <i>Enterococcus faecalis</i> (10 <sup>6</sup> –10 <sup>7</sup> )  | ATCC 1700  |                 |                                   |                                   |                                                 |                                | 6.5 log <sub>10</sub>     |
|      |                      | <i>Pseudomonas aeruginosa</i> (10 <sup>6</sup> –10 <sup>7</sup> ) | ATCC 27853 |                 |                                   |                                   |                                                 |                                | 0.7 log <sub>10</sub>     |
| 107  | Hyp                  | <i>S. aureus</i> (6×10 <sup>8</sup> )                             | ATCC 25923 | P               | 0.5 µg/mL/DS                      | 5 min/PBS buffer                  | LED; 590 nm;<br><sup>6</sup> —                  | 8 J/cm <sup>2</sup> /5 min     | 6.5 log <sub>10</sub>     |
|      |                      |                                                                   | UTMC 1484  | <sup>2</sup> B  |                                   |                                   |                                                 | 16 J/cm <sup>2</sup> /10 min   | <sup>7</sup> NS           |
|      |                      |                                                                   |            | B               |                                   |                                   |                                                 | 8 J/cm <sup>2</sup> /5 min     | 5.5-6.7 log <sub>10</sub> |
|      |                      |                                                                   | UTMC 1474  | P               |                                   |                                   |                                                 | 16 J/cm <sup>2</sup> /10 min   | NS                        |
|      |                      |                                                                   |            | B               |                                   |                                   |                                                 | 8 J/cm <sup>2</sup> /5 min     | 5.5-6.7 log <sub>10</sub> |
|      |                      |                                                                   | all type   | B               |                                   |                                   |                                                 | 16 J/cm <sup>2</sup> /10 min   | NS                        |
|      |                      |                                                                   |            |                 |                                   |                                   |                                                 | 0.5 µg/mL/DS                   | 10 min/<br>acetylcysteine |
| 100  | Hyp                  | <i>P. aeruginosa</i> (10 <sup>7</sup> –10 <sup>8</sup> )          | PAO1       | P               | 10 µM/DS;                         | 30 min/<br><sup>8</sup> LB medium | LED; 590 nm; 150 ±20 W/m <sup>2</sup>           | 162 J/cm <sup>2</sup> /180 min | NS                        |
|      |                      | <i>S. aureus</i> (10 <sup>7</sup> –10 <sup>8</sup> )              | KCTC 3881  |                 |                                   |                                   |                                                 | 54 J/cm <sup>2</sup> /60 min   | ~ 6.5 log <sub>10</sub>   |
|      |                      |                                                                   | KCTC 1916  |                 |                                   |                                   |                                                 |                                | ~ 7 log <sub>10</sub>     |

|                                                  |                |                                        |                         |     |                                                  |                                            |                                             |                              |                                    |                   |                                            |                                                     |                       |
|--------------------------------------------------|----------------|----------------------------------------|-------------------------|-----|--------------------------------------------------|--------------------------------------------|---------------------------------------------|------------------------------|------------------------------------|-------------------|--------------------------------------------|-----------------------------------------------------|-----------------------|
|                                                  |                |                                        | 2659<br>(MRSA)          |     |                                                  |                                            |                                             |                              | ~ 5.5 log <sub>10</sub>            |                   |                                            |                                                     |                       |
| 105                                              | Hyp            | <i>S. aureus</i><br>(10 <sup>6</sup> ) | ATCC<br>29213<br>(MSSA) | P   | 0.25 μM/DS                                       | 5 min/<br>°TSB medium                      | LED;<br>602±10 nm; 14<br>mW/cm <sup>2</sup> | 8 J/cm <sup>2</sup> /10 min  | complete<br>(6 log <sub>10</sub> ) |                   |                                            |                                                     |                       |
|                                                  |                |                                        |                         | P   | 0.015 μM/DS                                      |                                            |                                             | 25 J/cm <sup>2</sup> /30 min | complete<br>(6 log <sub>10</sub> ) |                   |                                            |                                                     |                       |
|                                                  |                |                                        |                         | B   | 0.015 μM/DS                                      | 24 h/PBS buffer                            |                                             | 25 J/cm <sup>2</sup> /30 min | 3.5 log <sub>10</sub>              |                   |                                            |                                                     |                       |
|                                                  |                |                                        | ATCC<br>33591<br>(MRSA) | P   | 1 μM/DS                                          | 5 min/TSB medium                           |                                             | 8 J/cm <sup>2</sup> /10 min  | complete<br>(6 log <sub>10</sub> ) |                   |                                            |                                                     |                       |
|                                                  |                |                                        |                         | P   | 0.015 μM/DS                                      |                                            |                                             | 25 J/cm <sup>2</sup> /30 min | complete<br>(6 log <sub>10</sub> ) |                   |                                            |                                                     |                       |
|                                                  |                |                                        |                         | B   | 250 μM/DS                                        | 20 min/PBS buffer                          |                                             | 25 J/cm <sup>2</sup> /30 min | 2.3 log <sub>10</sub>              |                   |                                            |                                                     |                       |
|                                                  |                |                                        | 112                     | Hyp | <i>Salmonella enterica</i><br>(10 <sup>7</sup> ) | DS88(SL56<br>76 Smr<br>Plm32)              |                                             | P                            | 1×10 <sup>-5</sup> M/DS            | 60 min/PBS buffer | LED;<br>585 nm;<br>3.84 mW/cm <sup>2</sup> | 13.8 J/cm <sup>2</sup> /—                           | 1 log <sub>10</sub>   |
|                                                  |                |                                        |                         |     |                                                  |                                            |                                             |                              |                                    |                   | LED+HPPL                                   | 13.8 J/cm <sup>2</sup> + 0.023 J/cm <sup>2</sup> /— | 6.7 log <sub>10</sub> |
| <i>Listeria monocytogenes</i> (10 <sup>7</sup> ) | ATCL3C<br>7644 | 1×10 <sup>-7</sup> M/DS                |                         |     | 60 min/PBS buffer                                | LED;<br>585 nm;<br>3.84 mW/cm <sup>2</sup> | 9.22 J/cm <sup>2</sup> /—                   |                              | 7 log <sub>10</sub>                |                   |                                            |                                                     |                       |
|                                                  |                |                                        |                         |     | 5 min/PBS buffer                                 |                                            | 2.3 J/cm <sup>2</sup> /—                    |                              | 2.2 log <sub>10</sub>              |                   |                                            |                                                     |                       |

|     |     |                                              |               |   |                         |                                 |                                            |                                                   |                         |
|-----|-----|----------------------------------------------|---------------|---|-------------------------|---------------------------------|--------------------------------------------|---------------------------------------------------|-------------------------|
|     |     |                                              |               |   |                         |                                 | LED+HPPL                                   | 2.3J/cm <sup>2</sup> + 0.023 J/cm <sup>2</sup> /— | 7 log <sub>10</sub>     |
| 113 | Hyp | <i>Bacillus cereus</i><br>(10 <sup>7</sup> ) | ATCC<br>12826 | P | 1×10 <sup>-7</sup> M/DS | 2 min/PBS buffer                | LED;<br>585 nm;<br>3.84 mW/cm <sup>2</sup> | 9.2 J/cm <sup>2</sup> /40 min                     | 3.5 log <sub>10</sub>   |
|     |     |                                              |               |   |                         | 60 min/PBS buffer               |                                            |                                                   | 4.4 log <sub>10</sub>   |
|     |     |                                              |               |   | 1×10 <sup>-7</sup> M/DS | 2 min/PBS buffer                |                                            |                                                   | 2.2 log <sub>10</sub>   |
|     |     |                                              |               |   |                         | 60 min/PBS buffer               |                                            |                                                   | 2.5 log <sub>10</sub>   |
| 115 | Hyp | <i>E. coli</i><br>(10 <sup>7</sup> )         | —             | P | 36 μM/DS                | 68 min/PBS buffer               | LED;<br>590 nm;<br>16.4 mW/cm <sup>2</sup> | 5.9 J/cm <sup>2</sup> /260 sec                    | 4.1 log <sub>10</sub>   |
| 102 | Hyp | <i>S. aureus</i> (~ 10 <sup>7</sup> )        | CECT 239      | P | 4 μM;<br>washed/DS      | 30 min/PBS buffer               | LED;<br>green light;<br>—                  | 18 J/cm <sup>2</sup> /15 min                      | ~ 7 log <sub>10</sub>   |
|     |     |                                              |               |   |                         | 30 min/20% PBS-<br>DMSO mixture |                                            |                                                   | ~ 6.5 log <sub>10</sub> |
|     |     |                                              |               |   | 4 μM;<br>washed/DS      | 30 min/PBS buffer               |                                            |                                                   | ~ 6 log <sub>10</sub>   |

|     |                                                                                 |                                     |               |   |                                      |                             |                                                       |                               |                      |
|-----|---------------------------------------------------------------------------------|-------------------------------------|---------------|---|--------------------------------------|-----------------------------|-------------------------------------------------------|-------------------------------|----------------------|
|     |                                                                                 |                                     |               |   |                                      | 30 min/20% PBS-DMSO mixture |                                                       |                               | $\sim 5.8 \log_{10}$ |
|     | Hyp-2 $\beta$ -LG (Hyp complex with the dimeric form of $\beta$ -lactoglobulin) |                                     |               |   | 4 $\mu$ M-200 $\mu$ M/DS             | 30 min/PBS buffer           | 18 J/cm <sup>2</sup> /5 min                           |                               | 5 $\log_{10}$        |
|     |                                                                                 |                                     |               |   |                                      | 30 min/20% PBS-DMSO mixture |                                                       |                               | $\sim 3 \log_{10}$   |
|     |                                                                                 |                                     |               |   | 4 $\mu$ M -200 $\mu$ M;<br>washed/DS | 30 min;<br>PBS buffer       |                                                       |                               | $\sim 5.8 \log_{10}$ |
|     |                                                                                 |                                     |               |   |                                      | 30 min/20% PBS-DMSO mixture |                                                       |                               | $\sim 3 \log_{10}$   |
| 109 | Hyp                                                                             | <i>S. aureus</i><br>( $\sim 10^7$ ) | CECT 239      | P | 8 $\mu$ M/DS                         | 30 min;<br>PBS buffer       | LED;<br>green light;<br>—                             | 18 J/cm <sup>2</sup> /15 min  | $\sim 7 \log_{10}$   |
|     | Hyp-2 $\beta$ -LG                                                               |                                     |               |   | 8 $\mu$ M -10 $\mu$ M/DS             |                             |                                                       | 37 J/cm <sup>2</sup> /30 min  | 5 $\log_{10}$        |
| 101 | Hyp                                                                             | <i>S. aureus</i><br>( $\sim 10^7$ ) | CECT 239      | P | 10 $\mu$ M/DS                        | 30 min/PBS buffer           | LED;<br>green light;<br>—                             | 18 J/cm <sup>2</sup> /15 min  | $\sim 7 \log_{10}$   |
|     | Hyp-ApoMb<br>(Hyp and apomyoglobin complex)                                     |                                     |               |   | 10 $\mu$ M (1:2)/DS                  |                             |                                                       | 37 J/cm <sup>2</sup> /30 min  | $\sim 5.5 \log_{10}$ |
| 104 | PVP-Hyp<br>(synthesized by non-covalently binding Hyp to polyvinylpyrrolidone)  | <i>S. aureus</i><br>( $\sim 10^8$ ) | DSMZ<br>18587 | P | 100 nM/DS                            | 5 min/TSB medium            | 1200 red light halogen lamp;<br>75 mW/cm <sup>2</sup> | 135 J/cm <sup>2</sup> /30 min | 5 $\log_{10}$        |

|     |     |                                             |                         |   |                                                      |                                               |                                                                    |                                  |                                   |                        |
|-----|-----|---------------------------------------------|-------------------------|---|------------------------------------------------------|-----------------------------------------------|--------------------------------------------------------------------|----------------------------------|-----------------------------------|------------------------|
| 110 | Hyp | <i>S. aureus</i><br>(10 <sup>8</sup> )      | Clinical isolate (MRSA) | P | 8 µM/DS                                              | 30 min/PBS buffer and <sup>10</sup> NB medium | 400 W quartz-halogen lamp; 600-800 nm; 14 mW/cm <sup>2</sup>       | 30 J/cm <sup>2</sup> /—          | complete (> 6 log <sub>10</sub> ) |                        |
|     |     |                                             | ATCC 25923 (MSSA)       |   | 40 µM/DS                                             |                                               |                                                                    |                                  | 0.18 log <sub>10</sub>            |                        |
| 108 | Hyp | <i>E. coli</i><br>(10 <sup>8</sup> )        | ATCC 25922              | P | 4 µM/DS                                              | 10 min; PBS buffer                            | Lumacare LC122 lamp; 590 nm; 100 mW/cm <sup>2</sup>                | 40 J/cm <sup>2</sup> /—          | 0.93 log <sub>10</sub>            |                        |
|     |     |                                             | ATCC 35556              |   |                                                      |                                               |                                                                    |                                  | 4.25 log <sub>10</sub>            |                        |
|     | Hyp | <i>E. coli</i><br>(10 <sup>8</sup> )        | ATCC 25922              |   |                                                      |                                               |                                                                    |                                  | 40 J/cm <sup>2</sup> /—           | 3.5 log <sub>10</sub>  |
|     |     |                                             | ATCC 35556              |   |                                                      |                                               |                                                                    |                                  |                                   | 6.85 log <sub>10</sub> |
| 111 | Hyp | <i>S. mutans</i><br>(10 <sup>8</sup> )      | OMZ 918                 | P | 10 µg/mL/DS                                          | 30 min/ <sup>11</sup> FUM medium              | halogen polymerization device; 400-505 nm; 1070 mW/cm <sup>2</sup> | 256.8 J/cm <sup>2</sup> /2×120 s | 99.9 %                            |                        |
|     |     |                                             | OMZ 176                 |   | 2.5 µg/mL/DS                                         | 15 min/FUM medium                             |                                                                    | 128.4 J/cm <sup>2</sup> /120 s   | 100%                              |                        |
| 114 | Hyp | <i>Shigella flexneri</i> (10 <sup>9</sup> ) | 1a                      | P | 2.4×10 <sup>-5</sup> M/dm <sup>3</sup> /Toxic effect | NaCl/dimethylformamide                        | white light; 5mW/cm <sup>2</sup>                                   | 27 J/cm <sup>2</sup> /90 min     | 1.3%                              |                        |
|     |     |                                             | 1b                      |   |                                                      |                                               |                                                                    |                                  | 78.3 %                            |                        |
|     |     |                                             | 2a                      |   |                                                      |                                               |                                                                    |                                  | 37.2 %                            |                        |

|     |                                                                          |                                          |                         |   |           |                       |                                                        |                               |                         |
|-----|--------------------------------------------------------------------------|------------------------------------------|-------------------------|---|-----------|-----------------------|--------------------------------------------------------|-------------------------------|-------------------------|
|     |                                                                          | <i>E. coli</i><br>(10 <sup>9</sup> )     | K12 781                 |   |           |                       |                                                        |                               | 1.2 %                   |
|     |                                                                          |                                          | K1 959                  |   |           |                       |                                                        |                               | 47.6 %                  |
|     |                                                                          | <i>B. subtilis</i> (10 <sup>9</sup> )    | 3                       |   |           |                       |                                                        |                               | 24.3 %                  |
| 103 | aHyp (non-purified, hydrophilic extract of <i>Hypericum perforatum</i> ) | <i>S. aureus</i><br>(~ 10 <sup>7</sup> ) | ATCC 25923              | P | 1 μM/DS   | 30 min;<br>PBS buffer | LED;<br>515 nm;<br>16 mW/cm <sup>2</sup>               | 9.6 J/cm <sup>2</sup> /10 min | 7 log <sub>10</sub>     |
| 117 | Hypocrellin B                                                            | <i>S. aureus</i> (10 <sup>8</sup> )      | —                       | P | 2.5 μM/DS | 60 min/—              | LED;<br>470 nm;<br>60 mW/cm <sup>2</sup>               | 0.3 J/cm <sup>2</sup> /—      | ~ 1.8 log <sub>10</sub> |
| 118 | Hypocrellin B                                                            | <i>E. coli</i> (10 <sup>8</sup> )        | DH5α                    | P | 25 μM/DS  | 60 min/LBmedium       | LED;<br>470 nm;<br>60 mW/cm <sup>2</sup>               | 12 J/cm <sup>2</sup> /—       | ~ 90 %                  |
| 119 | Hypocrellin B                                                            | <i>S. aureus</i> (10 <sup>7</sup> )      | ATCC 29213              | P | 100 μM/DS | 30 min/PBS buffer     | 50 W xenon lamp;<br>400-780 nm; 0.08 W/cm <sup>2</sup> | 72 J/cm <sup>2</sup> /900 sec | ~ 7 log <sub>10</sub>   |
|     |                                                                          |                                          |                         | B |           |                       |                                                        |                               | 3.56 log <sub>10</sub>  |
|     |                                                                          |                                          | Clinical isolate (MRSA) | P |           |                       |                                                        |                               | ~ 7 log <sub>10</sub>   |
|     |                                                                          |                                          |                         | B |           |                       |                                                        |                               | 3.71 log <sub>10</sub>  |
|     |                                                                          | <i>E. faecalis</i> (10 <sup>7</sup> )    | ATCC 29212              | P |           |                       |                                                        |                               | ~ 7 log <sub>10</sub>   |
|     |                                                                          |                                          |                         | B |           |                       |                                                        |                               | 3.29 log <sub>10</sub>  |
|     |                                                                          |                                          | VRE (ATCC 51299)        | P |           |                       |                                                        |                               | ~ 7 log <sub>10</sub>   |
|     |                                                                          |                                          |                         | B |           |                       |                                                        |                               | 3.35 log <sub>10</sub>  |

|     |               |                                                                  |                         |   |            |                    |                                                     |                                |                                |
|-----|---------------|------------------------------------------------------------------|-------------------------|---|------------|--------------------|-----------------------------------------------------|--------------------------------|--------------------------------|
|     |               | <i>S. pneumonia</i> (10 <sup>7</sup> )                           | ATCC 49619              | P |            |                    |                                                     |                                | ~ 7 log <sub>10</sub>          |
|     |               |                                                                  |                         |   | B          |                    |                                                     |                                |                                |
|     |               | <i>S. pneumonia</i> (10 <sup>7</sup> )                           | Clinical isolate of MDR | P |            |                    |                                                     |                                | ~ 7 log <sub>10</sub>          |
|     |               |                                                                  |                         |   |            | B                  |                                                     |                                |                                |
|     |               | <i>E. coli</i> (10 <sup>7</sup> )                                | ATCC 25922              | P |            |                    |                                                     |                                | 2 log <sub>10</sub>            |
|     |               | <i>K. pneumonia</i> (10 <sup>7</sup> )                           | ATCC 700603             | P |            |                    |                                                     |                                | 2 log <sub>10</sub>            |
| 120 | Hypocrellin A | <i>S. aureus</i> (10 <sup>7</sup> -10 <sup>8</sup> )             | 6538                    | P | 1 μM/DS    | 60 min/PBS buffer  | 50W halogen-tungsten lamp;<br>30 mW/cm <sup>2</sup> | 126 J/cm <sup>2</sup> /120 min | The survival 0.02%             |
|     |               | <i>B. subtilis</i> (10 <sup>7</sup> -10 <sup>8</sup> )           | 9372                    |   |            | 60 min/PBS buffer  |                                                     |                                | The survival less than 0.1%    |
|     |               | <i>E. coli</i> (10 <sup>7</sup> -10 <sup>8</sup> )               | ATCC 25922              |   |            | 60 min/PBS buffer  |                                                     |                                | NS                             |
|     |               |                                                                  |                         |   |            | +CaCl <sub>2</sub> |                                                     |                                | decreased the survival to 1.2% |
|     |               |                                                                  |                         |   |            | +MgCl <sub>2</sub> |                                                     |                                | decreased the survival to 1.7% |
|     |               | <i>SalmonellaTyphimurium</i> (10 <sup>7</sup> -10 <sup>8</sup> ) | 50013                   |   |            | 60 min/PBS buffer  |                                                     |                                | NS                             |
| 187 |               | <i>in situ</i> oral biofilms                                     |                         | B | 32 mg/mL/— |                    |                                                     | 60 J/cm <sup>2</sup> /5 min    | complete                       |

|     |                              |                                                                             |               |   |                     |                                                         |                                                 |                                        |                                       |
|-----|------------------------------|-----------------------------------------------------------------------------|---------------|---|---------------------|---------------------------------------------------------|-------------------------------------------------|----------------------------------------|---------------------------------------|
|     | Hypericum perforatum extract |                                                                             |               |   |                     | 2 min; intraoral devices with fixed bovine enamel slabs | VIS + wIRA; 200 mW/cm <sup>2</sup>              |                                        |                                       |
| 138 | Riboflavin (RF)              | <i>S. aureus</i> (10 <sup>5</sup> )                                         | MRSA Strain 1 | P | 0.1%/11% inhibition | 0 min/NB agar                                           | LED; 375 nm; 3 mW/cm <sup>2</sup>               | 5.4 J/cm <sup>2</sup> /30 min          | 98%                                   |
|     |                              |                                                                             |               |   |                     |                                                         | ambient light (300 lux); 107 μW/cm <sup>2</sup> | 0.193 J/cm <sup>2</sup> /30 min        | 13%                                   |
|     |                              |                                                                             | MRSA Strain 2 | P | 0.1%/3% inhibition  |                                                         | LED; 375 nm; 3 mW/cm <sup>2</sup>               | 5.4 J/cm <sup>2</sup> /30 min          | 100%                                  |
|     |                              |                                                                             |               |   |                     |                                                         | ambient light (300 lux); 107 μW/cm <sup>2</sup> | 0.193 J/cm <sup>2</sup> /30 min        | 15%                                   |
| 188 | RF                           | <i>L. monocytogenes</i> ; 4 strains cocktail (3.5 log CFU/cm <sup>2</sup> ) | 1/2a          | P | 100 μM/DS           | —/on smoked salmon                                      | LED; 460 nm; 15 mW/cm <sup>2</sup>              | 2400 J/cm <sup>2</sup> /—              | 1.2 log CFU/cm <sup>2</sup> (at 4 °C) |
|     |                              |                                                                             | 1/2b          |   |                     |                                                         |                                                 |                                        |                                       |
|     |                              |                                                                             | 3a            |   |                     |                                                         |                                                 |                                        |                                       |
|     |                              |                                                                             | 4b            |   |                     |                                                         |                                                 |                                        |                                       |
|     |                              |                                                                             |               |   |                     |                                                         |                                                 | 1.1 log CFU/cm <sup>2</sup> (at 12 °C) |                                       |
| 189 | RF                           | <i>E. coli</i> (10 <sup>7</sup> )                                           |               | P | 50 μM/DS            | 0 min/PBS buffer                                        | Visible white light; 38.6 W/m <sup>2</sup>      | 27,8 J/cm <sup>2</sup> /2 h            | ~ 4.5 log <sub>10</sub>               |
| 145 | RF                           | <i>S. aureus</i> (8×10 <sup>5</sup> )                                       | MRSA          | P | 0.01%/DS            | 0 min/fluid layer of 1.2 mm                             | 450 nm; —                                       | 84 J/cm <sup>2</sup> /—                | complete                              |



|                                                                    |                         |                                                         |                          |          |                                                                    |                                                                   |                                           |                                  |                                                             |
|--------------------------------------------------------------------|-------------------------|---------------------------------------------------------|--------------------------|----------|--------------------------------------------------------------------|-------------------------------------------------------------------|-------------------------------------------|----------------------------------|-------------------------------------------------------------|
| 190                                                                | RF                      | <i>S. epidermidis</i> ( $6.5 \times 10^7$ )             | ATCC 12228               | P        | 50 $\mu$ M/DS                                                      | –/in platelet concentrates                                        | UV lamps; 265 – 370 nm;<br>–              | 6.2 J/ cm <sup>2</sup> /8-10 min | $\geq 4.15$ log                                             |
|                                                                    |                         | <i>E. coli</i> ( $1.1 \times 10^8$ )                    | ATCC 25922               |          |                                                                    |                                                                   |                                           |                                  | $\geq 4.38$ log                                             |
| 142                                                                | RF                      | <i>S. epidermidis</i> ( $1.6\text{--}2.5 \times 10^4$ ) | RS 30 (s1)<br>ATCC 12228 | P        | 400 $\mu$ M/DS                                                     | –/in thin layers of fluid (0.4–1.76 mm)/RPMI (cell culture media) | UV-X;365nm;<br>2.7-3.3 mW/cm <sup>2</sup> | 10.8 J/cm <sup>2</sup> /60 min   | mean reduction from start point ranging between 86 and 90%  |
|                                                                    |                         | <i>S. aureus</i> ( $2.5\text{--}4.0 \times 10^4$ )      | RS 12(s1)<br>CCUG 15915  |          |                                                                    |                                                                   |                                           |                                  | mean reduction from start point ranging between 61 and 71%  |
|                                                                    |                         |                                                         | RS (s1)<br>ATCC 29213    |          |                                                                    |                                                                   |                                           |                                  | mean reduction from start point ranging between 98 and 100% |
| <i>P. aeruginosa</i> ( $9.4 \times 10^3\text{--}3.1 \times 10^4$ ) | RS 11(s1)<br>CCUG 17619 | RS 11 (s1)<br>ATCC 27853                                | P                        | 0.03%/DS | –/in thin layers of fluid (0.4–1.76 mm); RPMI (cell culture media) | UVA; 365 nm;<br>–                                                 | 10.8 J/cm <sup>2</sup> /60 min            | 80%                              |                                                             |
|                                                                    | 0.09%/DS                |                                                         |                          |          |                                                                    |                                                                   |                                           | 50%                              |                                                             |

|     |    |                                                   |                                                |   |          |                                                                    |                                  |                               |         |
|-----|----|---------------------------------------------------|------------------------------------------------|---|----------|--------------------------------------------------------------------|----------------------------------|-------------------------------|---------|
| 143 | RF | <i>S. epidermidis</i> (1.7–3.37×10 <sup>4</sup> ) | ATCC 12228 (S)                                 | P | 0.01%/DS | ⇒/in thin layers of fluid (0.4–1.76 mm); RPMI (cell culture media) | UVA; 365nm; 3 mW/cm <sup>2</sup> | 5.4 J/cm <sup>2</sup> /30 min | 80%-92% |
|     |    |                                                   | CCUG3525 7 (methicillin and oxacillin R)       |   |          |                                                                    |                                  |                               | 60%-70% |
|     |    | <i>S. aureus</i> (1.7–3.37×10 <sup>4</sup> )      | ATCC29213/CCUG15915(S)                         |   |          |                                                                    |                                  |                               | 80%-92% |
|     |    |                                                   | ATCC43300/CCUG41586 (oxacillin R, MecA+, nuc+) |   |          |                                                                    |                                  |                               | 80%-92% |
|     |    | <i>P. aeruginosa</i> (1.7–3.37×10 <sup>4</sup> )  | ATCC27853(S)                                   |   |          |                                                                    |                                  |                               | 80%-92% |
|     |    |                                                   | CCUG37384 (ciprofloxacin R)                    |   |          |                                                                    |                                  |                               | 80%-92% |
|     |    | <i>E. faecalis</i> (1.7–3.37×10 <sup>4</sup> )    | ATCC29212/CCUG9997(S)                          |   |          |                                                                    |                                  |                               | 60%-70% |
|     |    |                                                   | CCUG34062 (vancomycin R)                       |   |          |                                                                    |                                  |                               |         |

|     |                                                 |                                                 |                                       |   |           |                                     |                                                                                                                       |                                |                       |
|-----|-------------------------------------------------|-------------------------------------------------|---------------------------------------|---|-----------|-------------------------------------|-----------------------------------------------------------------------------------------------------------------------|--------------------------------|-----------------------|
| 144 | RF                                              | <i>S. aureus</i><br>(1.7–3.37×10 <sup>4</sup> ) | CCUG4158<br>6/ATCC<br>43300<br>(MRSA) | P | 0.01%/DS  | –/RPMI (cell<br>culture media)      | commercially<br>available lamp<br>for treatment of<br>acne TRIA<br>Beauty lamp;<br>412 nm;<br>47.7 mW/cm <sup>2</sup> | 28.6 J/cm <sup>2</sup> /10 min | 99%                   |
|     |                                                 |                                                 |                                       |   |           |                                     | prototype lamp;<br>450nm; 47.4<br>mW/cm <sup>2</sup>                                                                  | 28.4 J/cm <sup>2</sup> /10 min | 98%                   |
| 139 | RF                                              | <i>B. subtilis</i><br>(–)                       | –                                     | P | 10 μM/DS  | 10 min in glucose<br>minimal medium | 500 watt<br>tungsten-<br>halogen lamp; –                                                                              | –/20 min                       | effective             |
| 140 | RF                                              | <i>S. aureus</i> (~ 10 <sup>8</sup> )           | ATCC<br>29213                         | P | 0.1 %/DS  | 0 min/NB medium                     | UVA;365 nm;<br>3 mW/cm <sup>2</sup>                                                                                   | 5.4 J/cm <sup>2</sup> /30 min  | Not susceptible       |
| 146 | FLASH-01a<br>(synthesized RF<br>derivative with | <i>P. aeruginosa</i> (10 <sup>8</sup> )         | ATCC<br>BAA-44<br>(MRSA)              |   | 100 μM/DS | 10 s/aqueous<br>solutions           | Non-coherent<br>light;<br>380-600 nm;                                                                                 | 1.5 J/cm <sup>2</sup> /30 s    | 6.8 log <sub>10</sub> |

|     |                                                                  |                                                   |                    |   |            |                   |                                             |                                 |                         |
|-----|------------------------------------------------------------------|---------------------------------------------------|--------------------|---|------------|-------------------|---------------------------------------------|---------------------------------|-------------------------|
|     | single positive charge)                                          | <i>E. coli</i> (10 <sup>8</sup> )                 | O104:H4 (EHEC)     |   | 50 μM/DS;  |                   | 50 mW/cm <sup>2</sup>                       | 12 J/cm <sup>2</sup> /240 s     | 6.5 log <sub>10</sub>   |
|     |                                                                  | <i>Acinetobacter baumannii</i> (10 <sup>8</sup> ) | clinical isolate   |   | 100 μM;/DS |                   | 9 J/cm <sup>2</sup> /180 s                  | 6.6 log <sub>10</sub>           |                         |
|     |                                                                  | <i>S. aureus</i> (10 <sup>8</sup> )               | ATCC 25923 (MRSA)  |   | 50 μM/DS   |                   | 3 J/cm <sup>2</sup> /60 s                   | 6.6 log <sub>10</sub>           |                         |
|     | FLASH-07a (synthesized RF derivative with eight positive charge) | <i>P. aeruginosa</i> (10 <sup>8</sup> )           | ATCC BAA-44 (MRSA) |   | 50 μM/DS   |                   | 3 J/cm <sup>2</sup> /60 s                   | 6.7 log <sub>10</sub>           |                         |
|     |                                                                  | <i>E. coli</i> (10 <sup>8</sup> )                 | O104:H4 (EHEC)     |   | 50 μM/DS   |                   | 9 J/cm <sup>2</sup> /180 s                  | 6.6 log <sub>10</sub>           |                         |
|     |                                                                  | <i>A. baumannii</i> (10 <sup>8</sup> )            | clinical isolate   |   | 50 μM/DS   |                   | 4.5 J/cm <sup>2</sup> /90 s                 | 6.7 log <sub>10</sub>           |                         |
|     |                                                                  | <i>S. aureus</i> (10 <sup>8</sup> )               | ATCC 25923 (MRSA)  |   | 100 μM/DS  |                   | 1.5 J/cm <sup>2</sup> /30 s                 | 6.5 log <sub>10</sub>           |                         |
| 148 | FMN (RF-5-phosphate)                                             | <i>S. aureus</i> (1.5×10 <sup>8</sup> )           | clinical isolate   | P | 1 mg/dl/DS | 15 min/PBS buffer | LED; blue light; —                          | —/120 min                       | ~ 4.5 log <sub>10</sub> |
|     |                                                                  | <i>P. aeruginosa</i> (1.5×10 <sup>8</sup> )       |                    |   |            |                   |                                             | —/180 min                       | ~ 6 log <sub>10</sub>   |
| 149 | FMN                                                              | <i>E. coli</i> (1.2×10 <sup>10</sup> )            | DH5α               | P | 30 μM/DS   | 0 min/PBS buffer  | LED; 462 (410–510) nm; 2 mW/cm <sup>2</sup> | 14.4 J/cm <sup>2</sup> /120 min | 96%                     |
| 150 | FMN                                                              | <i>S. aureus</i> (10 <sup>7</sup> )               | BCRC 10451         | P | 120 μM/DS  | 0 min/PBS buffer  | Blue light; 2 mW/cm <sup>2</sup>            | 14.4 J/cm <sup>2</sup> /120 min | 94.9 %                  |
|     |                                                                  |                                                   |                    |   | 30 μM/DS   |                   | Violet light; 1 mW/cm <sup>2</sup>          | 1.8 J/cm <sup>2</sup> /30 min   | 96.3 %                  |

|     |                |                                                                                                                            |            |          |                                                                  |                                       |                                               |                                 |                                       |
|-----|----------------|----------------------------------------------------------------------------------------------------------------------------|------------|----------|------------------------------------------------------------------|---------------------------------------|-----------------------------------------------|---------------------------------|---------------------------------------|
|     |                |                                                                                                                            | MRSA JD004 |          | 120 µM/DS                                                        |                                       | Blue light;<br>2 mW/cm <sup>2</sup>           | 14.4 J/cm <sup>2</sup> /120 min | 95.2 %                                |
| 191 | Curcumin (CUR) | <i>L. monocytogenes</i> (10 <sup>8</sup> )four strain cocktail                                                             | ATCC 19115 | P        | 0.5 µM/DS                                                        | 20 min/0.85% physiological saline     | LED;<br>455-460 nm;<br>1.8 mW/cm <sup>2</sup> | 1.62 J/cm <sup>2</sup> /15 min  | complete (7.65 log <sub>10</sub> )    |
|     |                |                                                                                                                            | ATCC 13932 |          |                                                                  |                                       |                                               |                                 |                                       |
|     |                |                                                                                                                            | ATCC 7644  | B        | 20 µM/DS                                                         |                                       |                                               | 6.48 J/cm <sup>2</sup> /60 min  | OD <sub>600</sub> : from 2.10 to 0.93 |
|     |                |                                                                                                                            | 4bLM       |          |                                                                  |                                       |                                               |                                 |                                       |
| 192 | CUR            | Intact dentin caries biofilms                                                                                              | 3-day B    |          | 600 µM/L; 45 % reduction after 5 min incubation                  | LED;<br>455 nm; 40 mW/cm <sup>2</sup> | 75 J/cm <sup>2</sup> /-                       | 1min/<br>Glass slabs            | 62%                                   |
|     |                |                                                                                                                            |            |          |                                                                  |                                       |                                               | 5 min/<br>Glass slabs           | ~ 62 %                                |
|     |                |                                                                                                                            | 5-day B    |          | 600 µM/L; ~ 22% reduction after 2 min incubation                 |                                       |                                               | 1 min/<br>Glass slabs           | 17%                                   |
|     |                |                                                                                                                            |            |          |                                                                  |                                       |                                               | 5 min/<br>Glass slabs           | ~ 50 %                                |
| 160 | CUR            | <i>S. mutans</i> and <i>Lactobacillus acidophilus</i> (grown simultaneously in dentine carious lesions (10 <sup>8</sup> )) |            | 5 g/L/DS | to inoculate the bacterial-induced caries on human dentine slabs | LED;<br>450 nm;<br>-                  | 5.7 J/cm <sup>2</sup> /5 min                  | ~ 70%                           |                                       |
|     |                |                                                                                                                            |            |          |                                                                  |                                       | 5.7 J/cm <sup>2</sup> /2 min                  |                                 |                                       |
| 193 | CUR            | <i>Propionibacterium acnes</i> (2×10 <sup>5</sup> )                                                                        | BCRC 10723 | P        | 25 µM/<br>inhibition rate below 20 %                             | -/RCM medium                          | LED;<br>462 nm<br>3 mW/cm <sup>2</sup>        | 0.09 J/cm <sup>2</sup> /30 sek  | 100%                                  |
| 153 | CUR            | <i>E. faecalis</i> (5×10 <sup>9</sup> )                                                                                    |            | P        | 136 µM/DS                                                        | 5 min;TSBmedium                       | LED;                                          | 12.5 J/cm <sup>2</sup>          |                                       |

|                               |                        |                                      |                                   |   |           |                     |                                    |                               |                          |
|-------------------------------|------------------------|--------------------------------------|-----------------------------------|---|-----------|---------------------|------------------------------------|-------------------------------|--------------------------|
|                               |                        |                                      | ATCC 29212                        |   |           |                     | 450 nm; 151 mW/cm <sup>2</sup>     |                               | completely eliminate     |
|                               |                        | <i>P. acnes</i> (5×10 <sup>9</sup> ) | ATCC 6919                         |   | 14 μM/DS  | 5 min/BHI medium    |                                    |                               |                          |
| 161                           | CUR                    | <i>S. aureus</i> (10 <sup>7</sup> )  | ATCC 25923                        | P | 75 μM/DS  | 10 min/0.85% saline | LED; 470 nm; —                     | 139 J/cm <sup>2</sup> /10 min | 3.27 log <sub>10</sub>   |
|                               |                        |                                      |                                   |   |           |                     |                                    | 278 J/cm <sup>2</sup> /20 min | ~ 3.57 log <sub>10</sub> |
|                               |                        | 417 J/cm <sup>2</sup> /30 min        | complete (~ 6 log <sub>10</sub> ) |   |           |                     |                                    |                               |                          |
|                               |                        | 139 J/cm <sup>2</sup> /10 min        | 3.33 log <sub>10</sub>            |   |           |                     |                                    |                               |                          |
|                               |                        | 278 J/cm <sup>2</sup> /20 min        | complete (~ 6 log <sub>10</sub> ) |   |           |                     |                                    |                               |                          |
|                               |                        | 417 J/cm <sup>2</sup> /30 min        | complete (~ 6 log <sub>10</sub> ) |   |           |                     |                                    |                               |                          |
|                               |                        | 139 J/cm <sup>2</sup> /10 min        | 1.29 log <sub>10</sub>            |   |           |                     |                                    |                               |                          |
|                               |                        | 278 J/cm <sup>2</sup> /20 min        | 2.65 log <sub>10</sub>            |   |           |                     |                                    |                               |                          |
|                               |                        | 417 J/cm <sup>2</sup> /30 min        | complete (~ 6 log <sub>10</sub> ) |   |           |                     |                                    |                               |                          |
|                               |                        | 139 J/cm <sup>2</sup> /10 min        | 1.26 log <sub>10</sub>            |   |           |                     |                                    |                               |                          |
|                               |                        | 278 J/cm <sup>2</sup> /20 min        | 1.81 log <sub>10</sub>            |   |           |                     |                                    |                               |                          |
|                               |                        | 417 J/cm <sup>2</sup> /30 min        | 2.82 log <sub>10</sub>            |   |           |                     |                                    |                               |                          |
|                               |                        | 139 J/cm <sup>2</sup> /10 min        | 0.24 log <sub>10</sub>            |   |           |                     |                                    |                               |                          |
|                               |                        | 278 J/cm <sup>2</sup> /20 min        | 0.3 log <sub>10</sub>             |   |           |                     |                                    |                               |                          |
| 417 J/cm <sup>2</sup> /30 min | 0.33 log <sub>10</sub> |                                      |                                   |   |           |                     |                                    |                               |                          |
| 161                           | CUR                    | <i>S. aureus</i> (10 <sup>8</sup> )  | ATCC 27853                        | P | 2.5 μM/DS | 60 min/LB medium    | LED; 470 nm; 60 mW/cm <sup>2</sup> | 3 J/cm <sup>2</sup> /—        | 2 log <sub>10</sub>      |

|     |                  |                                          |                   |   |                                      |                            |                                                                          |                               |                                      |         |
|-----|------------------|------------------------------------------|-------------------|---|--------------------------------------|----------------------------|--------------------------------------------------------------------------|-------------------------------|--------------------------------------|---------|
| 195 | CUR              | <i>S. aureus</i> (10 <sup>6</sup> )      | ATCC 25923 (MSSA) | P | 5 µM/DS                              | 20 min; in sterile saline  | LED; 455 nm; 22 mW/cm <sup>2</sup>                                       | 18 J/cm <sup>2</sup> ;        | complete (6 log <sub>10</sub> )      |         |
|     |                  |                                          | ATCC 33591 (MRSA) |   | 10 µM/DS                             |                            |                                                                          | 25.5 J/cm <sup>2</sup> ;      |                                      |         |
|     |                  |                                          |                   |   | 20 µM/DS                             |                            |                                                                          | 37.5 J/cm <sup>2</sup>        |                                      |         |
|     |                  |                                          |                   |   | 20 µM/DS                             |                            |                                                                          | 37.5 J/cm <sup>2</sup> /      |                                      |         |
| 196 | CUR              | <i>L. innocua</i> (1.3×10 <sup>7</sup> ) | NCTC 11288        | B | 0.6 mg/L/DS                          | 30 min; in ringer solution | LED; 400-500; 150 mW/cm <sup>2</sup>                                     | 270 J/cm <sup>2</sup> /30 min | 4.4×10 <sup>3</sup> CFU/mL           |         |
|     |                  |                                          |                   |   | 3.7 mg/L/DS                          |                            |                                                                          |                               | 1.7×10 <sup>2</sup> CFU/mL           |         |
|     |                  |                                          |                   |   | P                                    |                            |                                                                          |                               | 0.6 mg/L/DS                          | 5.3 log |
|     |                  |                                          |                   |   |                                      |                            |                                                                          |                               | 3.7 mg/L/DS                          | 6.1 log |
|     | CUR rich extract |                                          |                   | B | 0.6 mg/L;/DS;                        |                            |                                                                          |                               | 1.4×10 <sup>5</sup> CFU/mL (2 log)   |         |
|     |                  |                                          |                   |   | 1.1 mg/L;/DS                         |                            |                                                                          |                               | 1.1×10 <sup>4</sup> CFU/mL (3.1 log) |         |
|     |                  |                                          |                   | P | 0.6 mg/L/DS;                         |                            |                                                                          |                               | 3.5 log                              |         |
|     |                  |                                          |                   |   | 1.1 mg/L/DS                          |                            |                                                                          |                               | 5.4 log                              |         |
| 155 | CUR              | <i>E. faecalis</i> (10 <sup>6</sup> )    | A197A             | P | 2.5 µM (in a 5% DMSO preparation)/DS | 30 min/PBS buffer          | Light-polymerisation unit equipped with three fluorescent tubes emitting | 0.5 J/cm <sup>2</sup> /—      | 99.8 %                               |         |

|     |     |                                          |                    |   |                                           |                  |                                                        |                             |                                    |
|-----|-----|------------------------------------------|--------------------|---|-------------------------------------------|------------------|--------------------------------------------------------|-----------------------------|------------------------------------|
|     |     | <i>S. intermedius</i> (10 <sup>6</sup> ) | ATCC 27335         |   |                                           |                  | blue light; 430 nm;<br>17.3 mW/cm <sup>2</sup>         |                             |                                    |
|     |     | <i>E. coli</i> (10 <sup>6</sup> )        | ATCC 25922         |   | 25 μM (in a 5% DMSO preparation)/DS       |                  |                                                        | 30 J/cm <sup>2</sup> /—     | ~ 100 %                            |
| 197 | CUR | <i>Lactobacilli</i> (10 <sup>8</sup> )   | ATCC 4646          | P | 10 μM/L/DS                                | 15 min/0.9% NaCl | Dental light source;<br>380-500 nm;<br>—               | —/240 sek                   | 100%                               |
| 154 | CUR | <i>E. faecalis</i> (10 <sup>8</sup> )    |                    | P | 20 μM/DS                                  | 5 min/ NaCl      | LED;<br>450 nm;<br>100 mW/cm <sup>2</sup>              | 5 min                       | 41%                                |
| 157 | CUR | <i>S. mutans</i> (10 <sup>9</sup> )      | OMZ 918            | P | 2 μM/DS                                   | 5 min/0.9% NaCl  | Dental QTH lamp;<br>360-550 nm; 450 mW/cm <sup>2</sup> | 54 J/cm <sup>2</sup> /120 s | 95%                                |
|     |     |                                          |                    | B | 60 μM/DS                                  | 10 min/0.9% NaCl |                                                        |                             | 44 % (± 12 %)                      |
| 159 | CUR | <i>S. mutans</i> (10 <sup>7</sup> )      | ATCC 25175         | P | 4000 μM                                   | 1 min/0.9% NaCl  | LED/<br>450 ±30 nm;<br>240.1 mW/cm <sup>2</sup>        | 72 J/cm <sup>2</sup> /300 s | 5.3 log <sub>10</sub>              |
| 158 | CUR | <i>S. mutans</i> (~2×10 <sup>9</sup> )   | ATCC 700610 UA 159 | P | 0.75 mM/ 0.90 log <sub>10</sub> reduction | 1 min/PBS buffer | LED;<br>420 ±20 nm; 95.5 mW/cm <sup>2</sup>            | 72 J/cm <sup>2</sup> /4 min | complete (5.97 log <sub>10</sub> ) |



|     |                                                                                                                                                                                 |                                                                |                           |   |                                              |                   |                                                                                                 |                               |                       |
|-----|---------------------------------------------------------------------------------------------------------------------------------------------------------------------------------|----------------------------------------------------------------|---------------------------|---|----------------------------------------------|-------------------|-------------------------------------------------------------------------------------------------|-------------------------------|-----------------------|
| 156 | CUR                                                                                                                                                                             | <i>E. faecalis</i><br>(5×10 <sup>6</sup> )                     | 135737                    | P | 10 μM/DS                                     | 30 min/PBS buffer | dental quartz—<br>tungsten—<br>halogen; 450 nm                                                  | 240 s                         | complete              |
|     |                                                                                                                                                                                 |                                                                |                           | B |                                              |                   |                                                                                                 |                               | complete              |
| 95  | Lyophilised<br>extract of<br>Solanumverbascif<br>olium flower                                                                                                                   | <i>S. epidermidis</i> (3×10 <sup>8</sup> )                     |                           | P | 0,05 mg/mL/DS                                | 60 min/PBS buffer | ELH tungsten<br>halogen GE<br>Quartzline<br>lamps with a<br>reflector;<br>23 mW/cm <sup>2</sup> | 55 J/cm <sup>2</sup> /40 min  | 4 log <sub>10</sub>   |
|     |                                                                                                                                                                                 |                                                                |                           |   |                                              |                   |                                                                                                 |                               | 10 min/PBS buffer     |
| 165 | Psoralen                                                                                                                                                                        | <i>E. coli</i> (~ 10 <sup>7</sup> )                            | CN-13<br>(ATCC<br>700609) | P | —                                            | + Lime Slurry     | solar exposures                                                                                 | 30-minute                     | > 6.1 logs            |
|     |                                                                                                                                                                                 |                                                                |                           |   |                                              | + Lime Juice      |                                                                                                 |                               | 5.6 log               |
| 198 | Protochlorophylli<br>de (a biosynthetic<br>intermediate<br>during<br>bacteriochlorophy<br>ll or chlorophyll<br>biosynthesis),<br>extract from<br>Rhodobactercaps<br>ulatus ZY5; | <i>S. aureus</i> (~10 <sup>7</sup> )                           | DSM 4910                  | P | 10 mg/L                                      | —/LB medium       | 60W tungsten<br>lamp;<br>700 Lux;<br>0.1 mWcm <sup>2</sup>                                      | 1.08 J/cm <sup>2</sup> /3 h   | 7.1 log <sub>10</sub> |
|     |                                                                                                                                                                                 | <i>B. subtilis</i> (~10 <sup>8</sup> )                         | DSM 618                   |   |                                              |                   |                                                                                                 | 1.08 J/cm <sup>2</sup> /3 h   | 5.1 log <sub>10</sub> |
|     |                                                                                                                                                                                 | <i>L. monocytogenes</i> (~<br>10 <sup>8</sup> )                | DSM 20600                 |   |                                              |                   |                                                                                                 | 1.08 J/cm <sup>2</sup> /3 h   | 3.1 log <sub>10</sub> |
|     |                                                                                                                                                                                 | <i>Yersinia<br/>pseudotuberculosis</i><br>(~ 10 <sup>7</sup> ) | YPIII                     |   |                                              |                   |                                                                                                 | 1.08 J/cm <sup>2</sup> /5.5 h | complete              |
|     |                                                                                                                                                                                 | <i>E. coli</i> (~ 10 <sup>7</sup> )                            | DH10B                     |   |                                              |                   |                                                                                                 | 0.72 J/cm <sup>2</sup> /2 h   | 7.0 log <sub>10</sub> |
|     |                                                                                                                                                                                 |                                                                |                           |   | 10 mg/L Pchl<br>ide + 50 mg/L<br>PMBN/<br>DS |                   |                                                                                                 | 0.54 J/cm <sup>2</sup> /1.5 h | 8.2 log <sub>10</sub> |
| 176 |                                                                                                                                                                                 | <i>S. aureus</i> (5×10 <sup>6</sup> )                          | ATCC8096                  |   | 10 <sup>-5</sup> M/DS                        | 1 h /NaCl;        |                                                                                                 | —/1 h                         | 3.1 log <sub>10</sub> |

|     |                                                                      |                                             |                          |                           |                           |                                             |                                          |                              |                                                  |
|-----|----------------------------------------------------------------------|---------------------------------------------|--------------------------|---------------------------|---------------------------|---------------------------------------------|------------------------------------------|------------------------------|--------------------------------------------------|
|     | Sodium chlorophyllin (not copperized chlorophyll sodium salt); (Chl) | <i>B. cereus</i> (5×10 <sup>6</sup> )       | ATCC9634                 |                           |                           | on plate count agar                         | Halogen photoptic lamp (1000 W);<br>—    |                              | 3.1 log <sub>10</sub>                            |
|     |                                                                      | <i>B. subtilis</i> (5×10 <sup>6</sup> )     | ATCC1904                 |                           |                           |                                             |                                          |                              |                                                  |
| 93  | Chl                                                                  | <i>L. monocytogenes</i> (10 <sup>7</sup> )  | ATCL <sub>3</sub> C 7644 | P                         | 7.5×10 <sup>-7</sup> M/DS | 2 min; in PBS buffer                        | LED;<br>400 nm;<br>20 mW/cm <sup>2</sup> | 6 J/cm <sup>2</sup> /5 min   | complete (7 log <sub>10</sub> )                  |
|     |                                                                      | <i>B. cereus</i> (10 <sup>7</sup> )         | ATCC 12826               |                           | 7.5×10 <sup>-7</sup> M/DS |                                             |                                          | 2.4 J/cm <sup>2</sup> /2 min |                                                  |
|     |                                                                      |                                             |                          |                           | 7.5×10 <sup>-8</sup> M/DS |                                             |                                          | 6 J/cm <sup>2</sup> /5 min   |                                                  |
|     |                                                                      | <i>S. enterica</i> (10 <sup>7</sup> )       | DS88(SL56 76 Smr Plm32)  | 7.5×10 <sup>-5</sup> M/DS | 60 min; in PBS buffer     | 24 J/cm <sup>2</sup> /20 min                | 1.6 log <sub>10</sub>                    |                              |                                                  |
| 178 | Chl                                                                  | <i>L. monocytogenes</i> (10 <sup>7</sup> )  | ATCL <sub>3</sub> C 7644 | P                         | 7.5×10 <sup>-7</sup> M/DS | 2 min/PBS buffer                            | LED;<br>405 nm; 20 mW/cm <sup>2</sup>    | 6 J/cm <sup>2</sup> /5 min   | complete (7 log <sub>10</sub> )                  |
|     |                                                                      | <i>L. monocytogenes</i> (10 <sup>7</sup> )  | 56 Ly                    |                           |                           |                                             |                                          | 36 J/cm <sup>2</sup> /30 min |                                                  |
| 179 | Chl                                                                  | <i>L. monocytogenes</i> (~10 <sup>7</sup> ) | ATCL <sub>3</sub> C 7644 | B                         | 1.5×10 <sup>-5</sup> M;   | 22 min; on the surface of packaging samples | LED;<br>405 nm;<br>12 mW/cm <sup>2</sup> | 3.6 J/cm <sup>2</sup> /5 min | 1.5 log <sub>10</sub>                            |
|     |                                                                      |                                             |                          |                           | 1.5×10 <sup>-4</sup> M    |                                             |                                          |                              | 4.5 log <sub>10</sub><br>(to undetectable level) |

|     |                                            |                                            |                       |   |                                                                              |                             |                                                              |                                |                        |
|-----|--------------------------------------------|--------------------------------------------|-----------------------|---|------------------------------------------------------------------------------|-----------------------------|--------------------------------------------------------------|--------------------------------|------------------------|
|     |                                            | <i>B. cereus</i> (~ 10 <sup>7</sup> )      | SV 90                 | P | 7.5×10 <sup>-7</sup> M/DS                                                    | 2 min; PBS buffer           |                                                              | 21.6 J/cm <sup>2</sup> /30 min | ~3.5 log <sub>10</sub> |
| 173 | Chl                                        | <i>S. aureus</i> (10 <sup>8</sup> )        | CECT 86               | P | PS immobilized in gellan films. It was added to the solution at 80 µg/mL./DS | 0 min/on the surface of TSA | quartz/halogen lamps; white light; LED; 470 nm;              | 30,000 lux/5 min               | 5 log <sub>10</sub>    |
|     |                                            | <i>L. monocytogenes</i> (10 <sup>8</sup> ) | CECT 934              |   |                                                                              |                             |                                                              |                                | ~5 log <sub>10</sub>   |
|     |                                            | <i>E. coli</i> (10 <sup>8</sup> )          | CECT 515              |   |                                                                              |                             |                                                              |                                | Not susceptible        |
|     |                                            | <i>Salmonella</i> spp. (10 <sup>8</sup> )  | CECT 409              |   |                                                                              |                             |                                                              |                                | Not susceptible        |
|     | Chlorophyllin sodium copper salt (CuChlNa) | <i>S. aureus</i> (10 <sup>8</sup> )        | CECT 86               |   |                                                                              |                             |                                                              |                                | 4 log <sub>10</sub>    |
|     |                                            | <i>L. monocytogenes</i> (10 <sup>8</sup> ) | CECT 934              |   |                                                                              |                             |                                                              |                                | ~ 4 log <sub>10</sub>  |
|     |                                            | <i>E. coli</i> (10 <sup>8</sup> )          | CECT 515              |   |                                                                              |                             |                                                              |                                | Not susceptible        |
|     |                                            | <i>Salmonella</i> spp. (10 <sup>8</sup> )  | CECT 409              |   |                                                                              |                             |                                                              |                                | Not susceptible        |
| 199 | CuChlNa                                    | <i>S. aureus</i> (~ 5×10 <sup>8</sup> )    | ATCC 25923            | P | 5 µM/DS                                                                      | 30 min/NaCl                 | LED; 405 nm; 8.3 mW/cm <sup>2</sup>                          | 30 J/cm <sup>2</sup> /60 min   | Complete               |
|     |                                            | <i>E. coli</i> (~ 5×10 <sup>8</sup> )      | ATCC 25922            | P | 5 µM/DS+ DMSO                                                                | 120 min/NaCl                |                                                              |                                | Not susceptible        |
| 180 | Chl                                        | <i>L. monocytogenes</i> (10 <sup>5</sup> ) | CECT 911 (ATCC 19112) | P | 1% (incorporated with PE)/DS                                                 | 0 min/on the surface of TSA | 500 W Haloline 64702 halogen lamps (Osram); infrared region; | 15 min                         | 0.65 log <sub>10</sub> |

|  |  |                                   |                          |  |                                   |                                                |                                                                         |                        |
|--|--|-----------------------------------|--------------------------|--|-----------------------------------|------------------------------------------------|-------------------------------------------------------------------------|------------------------|
|  |  |                                   |                          |  |                                   |                                                |                                                                         |                        |
|  |  |                                   |                          |  |                                   |                                                |                                                                         | 7,25 log <sub>10</sub> |
|  |  |                                   |                          |  |                                   |                                                |                                                                         | 7.01 log <sub>10</sub> |
|  |  |                                   |                          |  |                                   |                                                |                                                                         | 7.09 log <sub>10</sub> |
|  |  | <i>E. coli</i> (10 <sup>5</sup> ) | CECT 434<br>(ATCC 25922) |  |                                   |                                                |                                                                         | 0.67 log <sub>10</sub> |
|  |  |                                   |                          |  | 1%<br>(incorporated with PE)/DS   | on the surface of<br>TSA plates; 40 mM<br>EDTA | 50 W 81.575/Dia<br>LED lights<br>(Electro DH);<br>450 nm and 550<br>nm; | 7.47 log <sub>10</sub> |
|  |  |                                   |                          |  | 1%<br>(incorporated with PVOH)/DS |                                                |                                                                         |                        |
|  |  |                                   |                          |  | 1%<br>(incorporated with HPMC)/DS |                                                |                                                                         | 7.04 log <sub>10</sub> |

|     |                                         |                                                                                            |                                       |   |                                                    |                 |                               |                                  |                                       |
|-----|-----------------------------------------|--------------------------------------------------------------------------------------------|---------------------------------------|---|----------------------------------------------------|-----------------|-------------------------------|----------------------------------|---------------------------------------|
|     |                                         |                                                                                            |                                       |   | 1%<br>(incorporated<br>with G)/DS                  |                 |                               |                                  | 7.04 log <sub>10</sub>                |
| 182 | Chl(E)                                  | <i>E. coli</i> ; OD <sub>590</sub> = 0.1<br>(corresponding<br>to 0.8×10 <sup>8</sup> )     | DH5α                                  | P | 10 mg/L/<br>DS                                     | LB medium       | LED;<br>12 mW/cm <sup>2</sup> | 129.6 J/cm <sup>2</sup> /180 min | Not susceptible                       |
|     |                                         |                                                                                            |                                       |   | 10 mg/L Chl+0.1<br>µg/L colistin; ~<br>OD 0.2      |                 |                               |                                  | ~ OD 0.5                              |
|     |                                         | S.<br>Typhimurium OD <sub>590</sub><br>= 0.1<br>(corresponding<br>to 0.8×10 <sup>8</sup> ) | Ames9274                              |   | 0.5 mg/L/<br>DS                                    |                 |                               |                                  | Completely<br>inhibited the<br>growth |
|     |                                         |                                                                                            |                                       |   | 0.5 mg/L<br>Chl+0.1 µg/L<br>colistin;/<br>~ OD 0.2 |                 |                               |                                  | Completely<br>inhibited the<br>growth |
| 94  | Chl(prepared<br>from frozen<br>spinach) | <i>E. coli</i> (10 <sup>8</sup> )                                                          | DH5α                                  | P | 25 mg/L/DS                                         | 0 min/LB medium | LED;<br>12 mW/cm <sup>2</sup> | 30-180 min                       | Not susceptible                       |
|     |                                         | <i>E. coli</i> (10 <sup>6</sup> )                                                          | NR698<br>(MC4100<br><i>lptD4213</i> ) |   | 5 mg/L/DS                                          |                 |                               | 60 min                           | Completely<br>inactivated             |
|     |                                         | <i>B. subtilis</i> (10 <sup>8</sup> )                                                      | 168 ( <i>trpC2</i> )                  |   | 0.5 mg/L/DS                                        |                 |                               | 60 min                           | Completely<br>inactivated             |

|             |                                                 |                                              |                               |   |                                                                  |                                                    |                                                                                                     |                                |                                               |
|-------------|-------------------------------------------------|----------------------------------------------|-------------------------------|---|------------------------------------------------------------------|----------------------------------------------------|-----------------------------------------------------------------------------------------------------|--------------------------------|-----------------------------------------------|
| 200         | Chl                                             | <i>E. coli</i> (10 <sup>7</sup> )            | O157:H7                       | P | 1×10 <sup>-5</sup> M/DS                                          | 60 min;                                            | LED;<br>405 nm;<br>9.6 mW/cm <sup>2</sup><br>from top and<br>11.5 mW/cm <sup>2</sup><br>from bottom | 38 J/cm <sup>2</sup> /30 min   | ~3 log <sub>10</sub>                          |
|             | Chl + ZnO nanoparticles.                        |                                              |                               |   | 1×10 <sup>-4</sup> M/DS                                          | 15 min with ZnO +<br>15 min with<br>Chl/PBS buffer |                                                                                                     |                                | 4.5 log <sub>10</sub>                         |
| 177         | Chl                                             | <i>L. monocytogenes</i> (10 <sup>7</sup> )   | ATCL <sub>3</sub> C<br>7644   | P | 7.5×10 <sup>-7</sup> M/DS                                        | 2 min/PBS buffer                                   | LED;<br>400 nm;<br>20 mW/cm <sup>2</sup>                                                            | 3.6 J/cm <sup>2</sup> /5 min   | 7 log <sub>10</sub>                           |
|             |                                                 | <i>S. enterica</i> (10 <sup>7</sup> )        | DS88(SL56<br>76 Smr<br>Plm32) |   | 7.5×10 <sup>-5</sup> M/DS                                        |                                                    |                                                                                                     | 28.8 J/cm <sup>2</sup> /40 min | ~2.2 log <sub>10</sub>                        |
|             | Chl + 5-aminolevulinic acid hydrochloride (Ala) | <i>L. monocytogenes</i> (10 <sup>7</sup> )   | ATCL <sub>3</sub> C<br>7644   |   | 7.5×10 <sup>-7</sup> M Chl +<br>7.5×10 <sup>-3</sup> M<br>Ala/DS | 2 min; in PBS buffer                               |                                                                                                     | 17.3 J/cm <sup>2</sup> /30 min | undetectable level (~ 7.5 log <sub>10</sub> ) |
|             |                                                 | <i>S. enterica</i> (10 <sup>7</sup> )        | DS88(SL56<br>76 Smr<br>Plm32) |   | 7.5×10 <sup>-5</sup> M Chl +<br>7.5×10 <sup>-3</sup> M<br>Ala/DS | 60 min/PBS buffer                                  |                                                                                                     |                                | undetectable level (~ 7.5 log <sub>10</sub> ) |
| 201         | Chl-KCHS (chitosan)                             | <i>S. enterica</i> (10 <sup>8</sup> )        | DS88(SL56<br>76 Smr<br>Plm32) | P | 0.001% -<br>0.1%/DS                                              | 0-4 h/ LB medium                                   | LED;<br>405 nm;<br>9.6 mW/cm <sup>2</sup>                                                           | 17.3 J/cm <sup>2</sup> /30 min | Not susceptible                               |
|             |                                                 | <i>L. monocytogenes</i> (~ 10 <sup>8</sup> ) | ATCL <sub>3</sub> C<br>7644   |   | 0.001%-0.1%/ 5.4 log <sub>10</sub> -after 4 h incubation         | 0-4 h/LB medium                                    |                                                                                                     | 2.9 J/cm <sup>2</sup> /5 min   | complete (8 log <sub>10</sub> )               |
| 202/<br>175 | Chl- <sup>12</sup> CHSconjugate                 | <i>S. enterica</i> (10 <sup>7</sup> )        |                               | P | 1.5×10 <sup>-5</sup> M -<br>0.1%/2.15 log <sub>10</sub> -        | 0-120 min/0.9%<br>NaCl                             | LED;<br>405 nm;                                                                                     | 38 J/cm <sup>2</sup> /30 min   | complete (7 log <sub>10</sub> )               |

|     |                                                                                |                                                 |                               |   |                                                                      |                       |                                                                              |                              |                        |
|-----|--------------------------------------------------------------------------------|-------------------------------------------------|-------------------------------|---|----------------------------------------------------------------------|-----------------------|------------------------------------------------------------------------------|------------------------------|------------------------|
|     |                                                                                |                                                 | DS88(SL56<br>76 Smr<br>Plm32) |   | after 2 h<br>incubation                                              |                       | 21 mW/cm <sup>2</sup>                                                        |                              |                        |
| 181 | Chl-CHS                                                                        | <i>L. monocytogenes</i> (~<br>10 <sup>7</sup> ) | ATCL <sub>3</sub> C<br>7644   | P | 0.0001%-0.001%/<br>2.1 log <sub>10</sub> - after 2<br>min incubation | 2 min/0.9% NaCl       | LED;<br>405 nm;<br>9.6-11.52<br>mW/cm <sup>2</sup>                           | 2.9 J/cm <sup>2</sup> /2 min | 7.01 log <sub>10</sub> |
|     |                                                                                | <i>E. coli</i> (~ 10 <sup>7</sup> )             | 157:H7                        |   | 0.001% - 0.1%/<br>0.5 log <sub>10</sub> - after 1<br>h incubation    | 60 min/0.9% NaCl      |                                                                              | 38 J/cm <sup>2</sup> /30 min | 4.5 log <sub>10</sub>  |
|     |                                                                                |                                                 |                               |   |                                                                      |                       |                                                                              | 76 J/cm <sup>2</sup> /60 min | 7 log <sub>10</sub>    |
| 96  | water extract of<br>the calyces of<br><i>Hibiscus sabdariffa</i><br>L (cHs WE) | <i>E. coli</i> (~ 10 <sup>7</sup> )             | Nissle 1917                   | P | 1 mg/mL                                                              | in d H <sub>2</sub> O | Slide<br>Projector—Zett<br>Royal II afs;<br>420 nm;<br>10 mW/cm <sup>2</sup> | 12 J/cm <sup>2</sup> /20 min | complete -8.5<br>log   |
|     |                                                                                | <i>B. subtilis</i> (10 <sup>8</sup> )           | DB 104                        |   | 0.0625 mg/mL                                                         |                       |                                                                              |                              | 2.2 log                |
|     | methanol extract<br>of the calyces of<br><i>H. Sabdariffa</i> (cHs<br>ME)      | <i>E. coli</i> (~10 <sup>7</sup> )              | Nissle 1917                   |   | 1 mg/mL                                                              |                       |                                                                              |                              | 4.8 log                |
|     |                                                                                | <i>B. subtilis</i> (10 <sup>8</sup> )           | DB 104                        |   | 0.0625 mg/mL                                                         |                       |                                                                              |                              | complete- 8.5<br>log   |

<sup>1</sup>P - planktonic cells; <sup>2</sup>B - biofilms; <sup>3</sup>DS- doesn't show; <sup>4</sup>PBS – phosphate-buffered saline; <sup>5</sup>LED- light emitting diode; <sup>6</sup>—no information; <sup>7</sup>NS – not susceptible; <sup>8</sup>LB - Luria Bertani; <sup>9</sup>TSB - tryptic soy broth; <sup>10</sup>NB - nutrient broth; <sup>11</sup>FUM - fluid universal medium; <sup>12</sup>CHS- chitosan
